# Supplementary material
Source: PubMed Central journal article supplement (PMC5039395)
Supplement: jcav07p1731s1.pdf [file jcav07p1731s1.pdf]

**Supplemental Table 1.** Potential function of the five selected SNPs in *XPG* gene as predicted by SNPinfo

(<http://snpinfo.niehs.nih.gov/snpinfo/snpfunc.htm>) software

| rs        | Chr | Allele | Position <sup>a</sup> | Location     | TFBS | Splicing<br>(ESE or ESS) | miRNA<br>(miRanda) | miRNA<br>(Sanger) | Reg<br>Potential | Conservation | Nearby Gene | Distance (bp) | Allele | Asian | CHB   |
|-----------|-----|--------|-----------------------|--------------|------|--------------------------|--------------------|-------------------|------------------|--------------|-------------|---------------|--------|-------|-------|
| rs2094258 | 13  | C/T    | 102294760             | 5' near gene | Y    | --                       | --                 | --                | 0                | 0.001        | BIVM  ERCC5 | -2878  -1415  | C      | 0.627 | 0.661 |
| rs751402  | 13  | C/T    | 102296199             | 5' UTR       | Y    | Y                        | --                 | --                | 0.25613          | 0            | ERCC5       | 24  30147     | C      | 0.591 | 0.619 |
| rs2296147 | 13  | T/C    | 102296376             | 5' UTR       | Y    | --                       | --                 | --                | 0.175993         | 0            | ERCC5       | 201  29970    | T      | 0.838 | 0.768 |
| rs1047768 | 13  | T/C    | 102302518             | exon         | --   | Y                        | --                 | --                | 0.24405          | 0.914        | ERCC5       | 6343  23828   | T      | 0.778 | 0.720 |
| rs873601  | 13  | G/A    | 102326338             | 3' UTR       | --   | Y                        | Y                  | Y                 | 0                | 0.005        | ERCC5       | 30163  8      | G      | 0.517 | 0.464 |

<sup>a</sup> The position is based on HapMap Data Rel 27 Phase II+III, Feb09, on NCBI B36 assembly, dbSNP b126.

SNP, single nucleotide polymorphism; XPG, xeroderma pigmentosum group G; TFBS, transcription factor binding site; ESE, exon splicing enhancer; ESS, exon splicing silencer; bp, base pair; CHB, Han Chinese in Beijing, China; UTR, untranslated region; ERCC5, excision repair cross-complementation group 5.

**Supplemental Table 2.** *XPG* mRNA expression by the genotypes of SNPs, using genotype data from the HapMap and mRNA expression data were from SNPexp<sup>a</sup>

| Population       | rs2094258 C>T |     |             |                       |                                        | rs751402 C>T |     |             |                       |                                        | rs873601 G>A |     |             |                       |                                        |
|------------------|---------------|-----|-------------|-----------------------|----------------------------------------|--------------|-----|-------------|-----------------------|----------------------------------------|--------------|-----|-------------|-----------------------|----------------------------------------|
|                  | genotypes     | No. | Mean ± SD   | <i>P</i> <sup>b</sup> | <i>P</i> <sub>trend</sub> <sup>c</sup> | genotypes    | No. | Mean ± SD   | <i>P</i> <sup>b</sup> | <i>P</i> <sub>trend</sub> <sup>c</sup> | genotypes    | No. | Mean ± SD   | <i>P</i> <sup>b</sup> | <i>P</i> <sub>trend</sub> <sup>c</sup> |
| CHB              | CC            | 19  | 9.77 ± 0.21 |                       | <b>0.027</b>                           | CC           | 15  | 9.90 ± 0.19 |                       | 0.064                                  | GG           | 8   | 9.96 ± 0.15 |                       | <b>0.003</b>                           |
|                  | CT            | 23  | 9.90 ± 0.21 | <b>0.044</b>          |                                        | CT           | 22  | 9.86 ± 0.21 | 0.596                 |                                        | AG           | 26  | 9.88 ± 0.19 | 0.314                 |                                        |
|                  | TT            | 3   | 9.96 ± 0.16 | 0.142                 |                                        | TT           | 8   | 9.71 ± 0.24 | 0.055                 |                                        | AA           | 11  | 9.69 ± 0.23 | <b>0.011</b>          |                                        |
|                  | Dominant      | 26  | 9.91 ± 0.20 | <b>0.027</b>          |                                        | Dominant     | 30  | 9.82 ± 0.22 | 0.264                 |                                        | Dominant     | 37  | 9.82 ± 0.22 | 0.112                 |                                        |
|                  | Recessive     | 42  | 9.84 ± 0.21 | 0.349                 |                                        | Recessive    | 37  | 9.88 ± 0.28 | <b>0.046</b>          |                                        | Recessive    | 34  | 9.90 ± 0.18 | <b>0.003</b>          |                                        |
| Asian            | CC            | 30  | 9.72 ± 0.20 |                       | 0.186                                  | CC           | 30  | 9.79 ± 0.21 |                       | 0.196                                  | GG           | 20  | 9.77 ± 0.25 |                       | 0.106                                  |
|                  | CT            | 52  | 9.77 ± 0.23 | 0.292                 |                                        | CT           | 47  | 9.76 ± 0.22 | 0.537                 |                                        | AG           | 49  | 9.80 ± 0.21 | 0.682                 |                                        |
|                  | TT            | 8   | 9.82 ± 0.24 | 0.246                 |                                        | TT           | 13  | 9.69 ± 0.23 | 0.188                 |                                        | AA           | 21  | 9.67 ± 0.20 | 0.132                 |                                        |
|                  | Dominant      | 60  | 9.78 ± 0.23 | 0.230                 |                                        | Dominant     | 60  | 9.75 ± 0.22 | <b>0.046</b>          |                                        | Dominant     | 70  | 9.76 ± 0.21 | 0.776                 |                                        |
|                  | Recessive     | 82  | 9.76 ± 0.22 | 0.423                 |                                        | Recessive    | 77  | 9.77 ± 0.22 | 0.233                 |                                        | Recessive    | 69  | 9.79 ± 0.22 | <b>0.021</b>          |                                        |
| All <sup>d</sup> | CC            | 147 | 9.74 ± 0.19 |                       | 0.074                                  | CC           | 119 | 9.78 ± 0.22 |                       | <b>0.030</b>                           | GG           | 83  | 9.81 ± 0.22 |                       | <b>0.001</b>                           |
|                  | CT            | 108 | 9.78 ± 0.23 | 0.121                 |                                        | CT           | 119 | 9.77 ± 0.21 | 0.693                 |                                        | AG           | 114 | 9.77 ± 0.20 | 0.301                 |                                        |
|                  | TT            | 15  | 9.81 ± 0.25 | 0.212                 |                                        | TT           | 32  | 9.67 ± 0.21 | <b>0.010</b>          |                                        | AA           | 64  | 9.69 ± 0.20 | <b>0.002</b>          |                                        |
|                  | Dominant      | 123 | 9.79 ± 0.23 | 0.084                 |                                        | Dominant     | 151 | 9.75 ± 0.21 | 0.220                 |                                        | Dominant     | 178 | 9.74 ± 0.20 | <b>0.029</b>          |                                        |
|                  | Recessive     | 255 | 9.76 ± 0.21 | 0.387                 |                                        | Recessive    | 238 | 9.77 ± 0.21 | <b>0.008</b>          |                                        | Recessive    | 197 | 9.79 ± 0.21 | <b>0.001</b>          |                                        |

<sup>a</sup> Genotyping data for *XPG* by genotypes were obtained from the HapMap phase II release 23 data (<http://hapmap.ncbi.nlm.nih.gov/>) from EBV-transformed lymphoblastoid cell lines from 270 individuals and mRNA expression data were from SNPexp (<http://app3.titan.uio.no/biotools/help.php?app5snpexp>) also from the 270 individuals.

<sup>b</sup> Calculated by two-side Student's *t* test within the stratum.

<sup>c</sup> Trend test of *XPG* mRNA expression among three genotypes by a general linear model.

<sup>d</sup> There were missing data for the genotypes were not available for nine CEU subjects.
